# Supplementary material for: Comparative Analysis of Clinical and CT Findings in Patients with SARS-CoV-2 Original Strain, Delta and Omicron Variants
Source: MDPI journal article supplement (doi:10.3390/biomedicines11030901), 2023-03-14
Supplement: s1 [file s1]

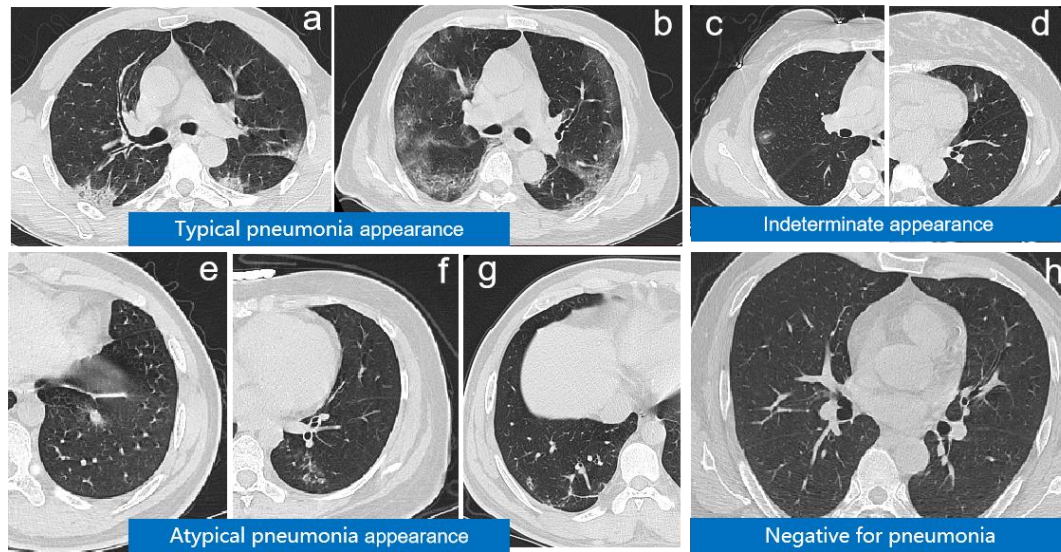

Figure S1. COVID-19 pneumonia imaging classification. (a, b) Typical CT imaging features for COVID-19: bilateral and peripheral GGO with superimposed interlobular septal thickening. (c, d) Indeterminate appearance for COVID-19: focal GGO lacking a specific distribution or nonrounded. (e-g) Atypical appearance, isolated lobar or segmental consolidation without GGO(e), Discrete small nodules (centrilobular, "tree-in bud") (f, g), (h) Negative for COVID-19 CT scan.

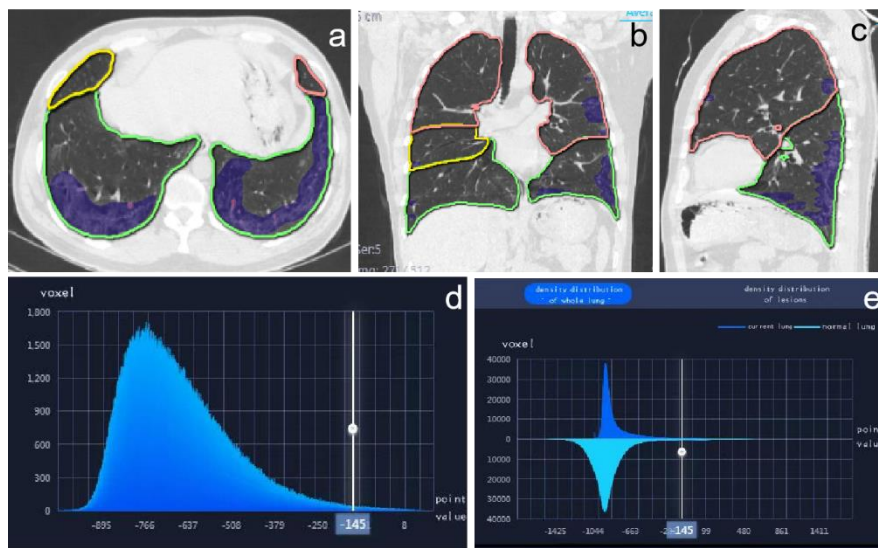

Figure S2. Quantitative CT analysis by artificial intelligence software.

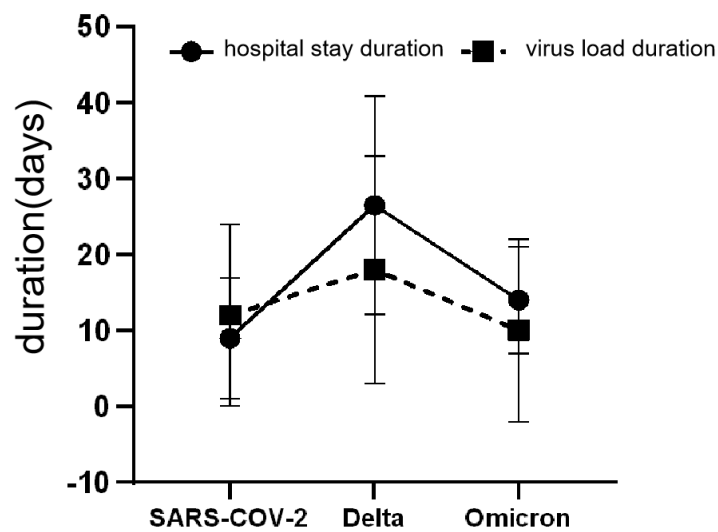

Figure S3. Duration of infection and hospital stays among three groups.

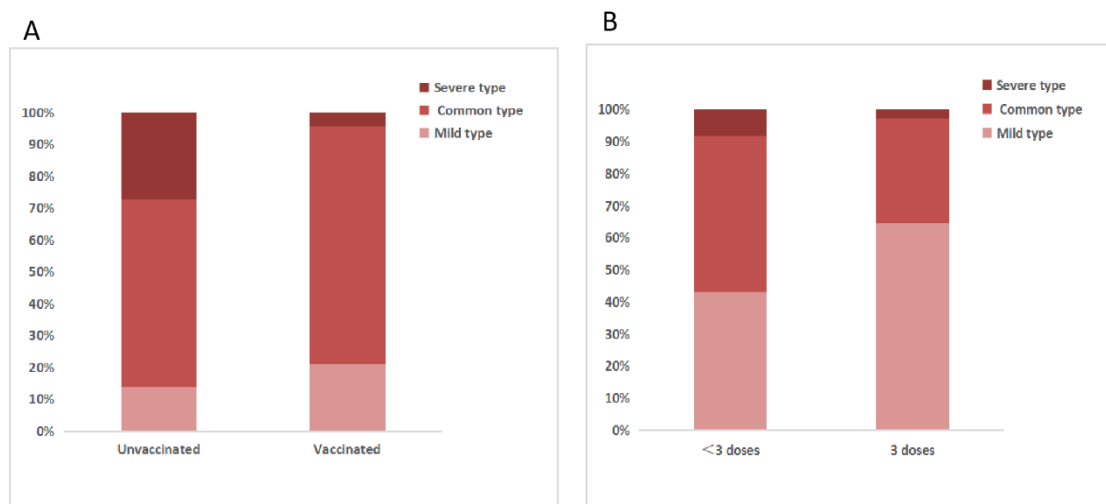

Figure S4. The proportion of patients with each category of clinical severity by variant or vaccine status. (A) Comparison of clinical severity in vaccinated versus unvaccinated patients infected with the Delta variant; (B) Comparison of clinical severity of Omicron variant infection in patients who received the third dose of vaccine versus those who did not receive the third dose

**Table S1 The criteria of clinical severity**

| Clinical severity | Diagnostic criteria                                                                                                                                                                                                                                                                             |
|-------------------|-------------------------------------------------------------------------------------------------------------------------------------------------------------------------------------------------------------------------------------------------------------------------------------------------|
| mild              | with mid clinical symptoms but without radiological findings of pneumonia                                                                                                                                                                                                                       |
| moderate          | with fever, respiratory symptoms, etc., and radiological findings of pneumonia                                                                                                                                                                                                                  |
| severe            | with any one of the following:<br>1. respiratory distress, respiratory rate (RR) $>30$ breaths per minute<br>2. oxygen saturation $\leq 93\%$ at rest<br>3. ratio of partial pressure of arterial oxygen (PaO <sub>2</sub> ) to fraction of inspired oxygen (FiO <sub>2</sub> ) $\leq 300$ mmHg |
| critical          | with any one of the following:<br>1. with respiratory failure and requiring mechanical ventilation;<br>2. developing shock<br>3. combined with other organ failure treated in the intensive care unit.                                                                                          |

**Table S2 Multivariable logistic regression analysis models for the association between clinical severity and listed variables**

| Clinical severity-moderate | Coefficient | SE    | z value | Wald $\chi^2$ | P value | OR value | OR value 95% CI |
|----------------------------|-------------|-------|---------|---------------|---------|----------|-----------------|
| SARS-CoV-2 variants        | -1.183      | 0.252 | -4.698  | 22.071        | 0.000   | 0.306    | 0.187 ~ 0.502   |
| Gender                     | 0.051       | 0.287 | 0.178   | 0.032         | 0.859   | 1.052    | 0.600 ~ 1.845   |
| Age                        | 0.045       | 0.010 | 4.617   | 21.320        | 0.000   | 1.046    | 1.026 ~ 1.066   |
| Comorbidities              | 0.367       | 0.372 | 0.987   | 0.973         | 0.324   | 1.444    | 0.696 ~ 2.994   |
| Number of vaccination      | -0.368      | 0.142 | -2.593  | 6.726         | 0.010   | 0.692    | 0.524 ~ 0.914   |
| Intercept                  | 0.817       | 0.520 | 1.571   | 2.467         | 0.116   | 2.263    | 0.817 ~ 6.270   |
| Clinical severity-severe   | B           | SE    | z value | Wald $\chi^2$ | P value | OR value | OR value 95% CI |
| SARS-CoV-2 variants        | -1.553      | 0.337 | -4.608  | 21.238        | 0.000   | 0.212    | 0.109 ~ 0.410   |
| Gender                     | 0.591       | 0.377 | 1.566   | 2.452         | 0.117   | 1.806    | 0.862 ~ 3.784   |
| Age                        | 0.076       | 0.013 | 5.684   | 32.310        | 0.000   | 1.079    | 1.051 ~ 1.107   |
| Comorbidities              | 0.348       | 0.452 | 0.769   | 0.591         | 0.442   | 1.416    | 0.584 ~ 3.436   |
| Number of vaccination      | -0.607      | 0.248 | -2.450  | 6.001         | 0.014   | 0.545    | 0.335 ~ 0.886   |
| Intercept                  | -2.284      | 0.751 | -3.041  | 9.251         | 0.002   | 0.102    | 0.023 ~ 0.444   |

McFadden  $R^2=0.265$

Cox & Snell  $R^2=0.395$

Nagelkerke  $R^2=0.464$

**Table S3 Comparison of laboratory examinations of different strains**

| Laboratory examination tests           | Normal Range | Original strain (n=245)         | Delta variant (n=90)          | Omicron variant (n=168) | P value |
|----------------------------------------|--------------|---------------------------------|-------------------------------|-------------------------|---------|
| Duration of positive nucleic acid      | -            | 12(8,20)                        | 18(11-26)                     | 10(1-13)                | <0.001  |
| ORF                                    | negative     | --                              | 23.6(11.3-29.8) <sup>c</sup>  | 29.9(24.8-33.2)         | <0.001  |
| N gene                                 | negative     | --                              | 22.6(14.1-28.3) <sup>c</sup>  | 27.6(24.6-32)           | <0.001  |
| IgM                                    | 0            | --                              | 0(0-0) <sup>c</sup>           | 0.07(0.05-0.18)         | <0.001  |
| IgG                                    | 0            | --                              | 0(0-0) <sup>c</sup>           | 22.1(2.1-149.6)         | <0.001  |
| Leukocyte count (×10 <sup>9</sup> /L)  | 3.5-9.5      | 6.7(5.1-10.7) <sup>a,b</sup>    | 5.8(4.6-7.1)                  | 6.3(4.8-8.0)            | 0.372   |
| Lymphocyte count (×10 <sup>9</sup> /L) | 1.1-3.2      | 0.8(0.51-1.2) <sup>a,b</sup>    | 1.2(0.8-1.8)                  | 1.2(0.8-1.8)            | <0.001  |
| Hemoglobin (g/L)                       | 130.0-175.0  | 113(104-125) <sup>a,b</sup>     | 148 (130.5-155) <sup>c</sup>  | 141(27-149)             | 0.457   |
| D-dimer (μg/L)                         | <0.5         | 2.7(0.7-11.1) <sup>a,b</sup>    | 0.3(0.2-0.6)                  | 0.25(0.14-0.39)         | <0.001  |
| Glucose(mmol/L)                        | 3.9-6.1      | 8.1(6.5-10.3) <sup>a,b</sup>    | 6.2(4.9,6.7)                  | 6.2(5.3-7.0)            | <0.001  |
| ALT (U/L)                              | 5.0-50.0     | 55(26-86.3) <sup>a,b</sup>      | 22(13-38)                     | 29(24.3-42.8)           | 0.181   |
| AST (U/L)                              | 15.0-40.0    | 43(28-66) <sup>a,b</sup>        | 28(25-39)                     | 21(17.0-28.0)           | 0.828   |
| LDH (U/L)                              | 109.0-245.0  | 343(263-500) <sup>a,b</sup>     | 200(162.5-271.3) <sup>c</sup> | 156 (138.5-170)         | 0.277   |
| IL-6 (pg/mL)                           | <7.0         | 9.5(7.0-12.8)                   | 10.6(7.4-15.0) <sup>c</sup>   | 7.9(4.9-11.6)           | 0.013   |
| Procalcitonin (ng/mL)                  | <0.5         | 0.05(0.05-0.12) <sup>a,b</sup>  | 0.02(0.02-0.05) <sup>c</sup>  | 0.013(0.002-0.028)      | 0.996   |
| CRP(mg/L)                              | <8.0         | 46.3(12.8-112.2) <sup>a,b</sup> | 7.3(0.6-22.3)                 | 3.7(1.2-10.6)           | <0.001  |

The data are presented as mean value standard deviation or medians (interquartile ranges).

ALT: alanine aminotransferase; AST: aspartate transaminase; LDH: lactate dehydrogenase; IL-6: interleukin-6; ESR: erythrocyte sedimentation rate; CRP: C-reactive protein

a, p < 0.05 between Original strain and Delta strain;

b, p < 0.05 between Original strain and Omicron strain;

c, p < 0.05 between Delta strain and Omicron strain.

**Table S4 Univariable logistic regression analysis models for the association between total CT score and listed variables**

| Variable              | Coefficient | SE    | z value | Wald $\chi^2$ | P value | OR value | OR value 95% CI |
|-----------------------|-------------|-------|---------|---------------|---------|----------|-----------------|
| SARS-CoV-2 variants   | -0.956      | 0.208 | -4.602  | 21.178        | 0.000   | 0.384    | 0.256 ~ 0.578   |
| Gender                | 0.299       | 0.256 | 1.169   | 1.366         | 0.243   | 1.349    | 0.817 ~ 2.228   |
| Age                   | 0.005       | 0.008 | 0.662   | 0.439         | 0.508   | 1.005    | 0.989 ~ 1.022   |
| Comorbidities         | 0.491       | 0.298 | 1.647   | 2.712         | 0.100   | 1.634    | 0.911 ~ 2.931   |
| Number of vaccination | -0.025      | 0.154 | -0.165  | 0.027         | 0.869   | 0.975    | 0.722 ~ 1.318   |
| Intercept             | 1.054       | 0.467 | 2.259   | 5.103         | 0.024   | 2.870    | 1.150 ~ 7.163   |

Total CT score cutoff  $>5$

McFadden  $R^2=0.138$

Cox & Snell  $R^2=0.116$

Nagelkerke  $R^2=0.196$

**Table S5 AI evaluation results of pneumonia with different SARS-CoV-2 strains**

| CT characteristics     | Original strain<br>(n=245)   | Delta variant<br>(n=90) | Omicron variant<br>(n=168) | P value |
|------------------------|------------------------------|-------------------------|----------------------------|---------|
| Lesion volume          |                              |                         |                            |         |
| Bilateral lungs        | 255(64,578) <sup>a,b</sup>   | 60.5(31.9,112)          | 45.8(27.6,103)             | < 0.001 |
| right lung             | 157(28.8,367) <sup>a,b</sup> | 39.9(13.8,85.1)         | 29.8(7.5,40.3)             |         |
| left lung              | 83(21,248.6) <sup>a,b</sup>  | 32.9(0,59.6)            | 26.1(0,62.6)               | 0.001   |
| CT value of lesions    |                              |                         |                            |         |
| Bilateral lungs        | 312(84,639) <sup>a,b</sup>   | 66(36,100)              | 53.3(27.6,93.7)            | <0.001  |
| right lung             | 201(44,392) <sup>a,b</sup>   | 41(24,80.7)             | 37(41.6,69.7)              | <0.001  |
| left lung              | 122(30,251) <sup>a,b</sup>   | 25(14.2,50.6)           | 22.0(10.8,57)              | <0.001  |
| CT value of whole lung | 1.8(1.5,2.1) <sup>a,b</sup>  | 2.1(1.5,2.4)            | 2.2(1.8,2.6)               | <0.001  |
| Whole lung volume      |                              |                         |                            |         |
| Bilateral lungs        | 3847±980                     | 4022±1031               | 4525±1245                  | 0.062   |
| right lung             | 2060±535                     | 2125±510                | 2391±640                   | 0.260   |
| left lung              | 1788±469 <sup>b</sup>        | 1897±534                | 2134±619                   | 0.046   |
| Proportion of lesions  |                              |                         |                            |         |
| Bilateral lungs        | 6.6(1.7,18.8) <sup>a,b</sup> | 2.6(2.1,7.5)            | 1.2(0.8,3.9)               | <0.001  |
| right lung             | 6.7(1.3,19.2) <sup>a,b</sup> | 1.1(0.2,5.1)            | 0.9(0.2,2.8)               | <0.001  |
| left lung              | 5.4(1.1,18.1) <sup>a,b</sup> | 0.15(0,3.1)             | 0.2(0,5.4)                 | <0.001  |

a, p < 0.05 between Original strain and Delta strain;

b, p < 0.05 between Original strain and Omicron strain;

c, p < 0.05 between Delta strain and Omicron strain.

**Table S6 Multivariable logistic regression analysis models for the association between clinical severity and listed variables in patients infected with Omicron variant**

| Clinical severity-moderate | Coefficient | SE    | z value | Wald $\chi^2$ | P value | OR value | OR value 95% CI |
|----------------------------|-------------|-------|---------|---------------|---------|----------|-----------------|
| Vaccination booster        | -1.16       | 0.442 | -2.625  | 6.891         | 0.009   | 0.313    | 0.132 ~ 0.745   |
| Gender                     | -0.27       | 0.426 | -0.634  | 0.402         | 0.526   | 0.763    | 0.331 ~ 1.759   |
| Age                        | 0.087       | 0.017 | 5.086   | 25.869        | 0       | 1.091    | 1.055 ~ 1.129   |
| Comorbidities              | -0.122      | 0.573 | -0.213  | 0.045         | 0.832   | 0.885    | 0.288 ~ 2.720   |

**Table S6 Multivariable logistic regression analysis models for the association between clinical severity and listed variables in patients infected with Omicron variant**

|                          |             |          |         |               |         |             |                  |
|--------------------------|-------------|----------|---------|---------------|---------|-------------|------------------|
| Intercept                | -3.287      | 0.766    | -4.293  | 18.433        | 0       | 0.037       | 0.008 ~ 0.168    |
| Clinical severity-severe | Coefficient | SE       | z value | Wald $\chi^2$ | P value | OR value    | OR 值 95% CI      |
| Vaccination booster      | -2.088      | 1.027    | -2.034  | 4.135         | 0.042   | 0.124       | 0.017 ~ 0.927    |
| Gender                   | 0.732       | 1.006    | 0.727   | 0.529         | 0.467   | 2.078       | 0.289 ~ 14.934   |
| Age                      | 0.1         | 0.035    | 2.833   | 8.028         | 0.005   | 1.105       | 1.031 ~ 1.184    |
| Comorbidities            | 18.741      | 5296.981 | 0.004   | 0             | 0.997   | 137805126.2 | 0.000 ~ Infinity |
| Intercept                | -24.724     | 5296.981 | -0.005  | 0             | 0.996   | 0           | 0.000 ~ Infinity |

McFadden  $R^2=0.329$

Cox & Snell  $R^2=0.423$

Nagelkerke  $R^2=0.521$

**Table S7 Multivariable logistic regression analysis models for the association between lung involvement and listed variables in patients infected with Omicron variant**

| Variable            | Coefficient | SE    | z value | Wald $\chi^2$ | P value | OR value | OR value 95% CI |
|---------------------|-------------|-------|---------|---------------|---------|----------|-----------------|
| Vaccination booster | -0.782      | 0.337 | -2.319  | 5.378         | 0.020   | 0.458    | 0.236 ~ 0.886   |
| Gender              | -0.367      | 0.333 | -1.103  | 1.217         | 0.270   | 0.693    | 0.361 ~ 1.330   |
| Age                 | 0.013       | 0.012 | 1.085   | 1.177         | 0.278   | 1.013    | 0.990 ~ 1.036   |
| Comorbidities       | 0.081       | 0.497 | 0.162   | 0.026         | 0.871   | 1.084    | 0.409 ~ 2.870   |
| Intercept           | -0.140      | 0.559 | -0.251  | 0.063         | 0.802   | 0.869    | 0.290 ~ 2.601   |

McFadden  $R^2= 0.051$

Cox & Snell  $R^2=0.067$

Nagelkerke  $R^2=0.090$
